# Supplementary material for: Genomic Analyses Reveal Broad Impact of miR-137 on Genes Associated with Malignant Transformation and Neuronal Differentiation in Glioblastoma Cells
Source: PLoS One. 2014 Jan 22;9(1):e85591. doi: 10.1371/journal.pone.0085591 (PMC3899048; doi:10.1371/journal.pone.0085591)
Supplement: Table S2 — Gene ontology of identified miR-137 targets. (XLSX) [file pone.0085591.s009.xlsx]

## Sheet: david.txt
Term	PValue	Fold Enrichment	Benjamini	Genes
GO:0007049~cell cycle	1.58737e-06	2.05331	0.00374234	CLSPN, JUB, CEP72, SEPT3, ZAK, E2F7, AURKA, TGFB2, MCM8, PSMC3IP, MTBP, CABLES2, SIK1, SNHG3-RCC1, MAP2K6, CDC6, SGOL1, CDK6, HMGA2, ESCO2, FOXN3, MCM6, EIF4G2, MAD2L1, ZWINT, NUP43, BCAT1, ZMYND11, HAUS5, NEK2, RCC1, CCNG2, SKA2, TCF3, HELLS, TRIP13, EXO1, YEATS4, KAT2B, MSH2, TPD52L1, CENPE, CDKN3, APPL2, SMC2, SMC4, ERBB2IP, PLK2, UBA3, PHGDH, CALM3, MYH10
GO:0045216~cell-cell junction organization	9.99102e-05	7.14114	0.111304	CDC42, SHROOM2, NLGN4X, AMOT, CXADR, VCL, TGFB2, GJC1
GO:0022402~cell cycle process	0.000141271	1.99067	0.105272	BCAT1, CEP72, HAUS5, ZAK, NEK2, AURKA, RCC1, CCNG2, TGFB2, PSMC3IP, MTBP, SKA2, SNHG3-RCC1, TCF3, MAP2K6, HELLS, TRIP13, EXO1, YEATS4, CDC6, KAT2B, MSH2, SGOL1, CDK6, TPD52L1, CENPE, HMGA2, CDKN3, SMC2, FOXN3, SMC4, EIF4G2, MAD2L1, ZWINT, PHGDH, NUP43, MYH10
GO:0051301~cell division	0.00020665	2.43586	0.114886	CDC6, SEPT3, HAUS5, NEK2, SGOL1, CDK6, CENPE, KIT, HMGA2, RCC1, CCNG2, SMC2, SMC4, TGFB2, CDC42, MAD2L1, ZWINT, CABLES2, SKA2, CDCA7L, NUP43, SNHG3-RCC1, HELLS, MYH10
GO:0000278~mitotic cell cycle	0.000352808	2.19542	0.153543	BCAT1, HAUS5, NEK2, AURKA, RCC1, CCNG2, MTBP, SKA2, SNHG3-RCC1, TCF3, HELLS, CDC6, YEATS4, SGOL1, CDK6, TPD52L1, CENPE, CDKN3, HMGA2, SMC2, FOXN3, SMC4, MAD2L1, PLK2, ZWINT, UBA3, NUP43
GO:0007010~cytoskeleton organization	0.000362555	2.07806	0.133031	CEP72, HAUS5, NEK2, CALD1, DIAPH3, PDLIM3, AURKA, RCC1, TTL, CTTNBP2, CDC42, PAK2, TMSB15B, CNN2, SNHG3-RCC1, NEFL, TBCE, SS18, BBS2, NRAS, NCK2, ERBB2IP, SGCG, ZWINT, SVIL, LIMCH1, CDC42BPA, AMOT, DBN1, MYH10
GO:0008654~phospholipid biosynthetic process	0.000405011	3.67559	0.127759	PIGK, AGPAT5, LPGAT1, SPHK2, ABHD5, AGPAT9, MBOAT2, LPCAT2, GPAM, ALG12, AGPAT3, CHPT1
GO:0034330~cell junction organization	0.000424388	4.93303	0.117792	CDC42, JUB, SHROOM2, NLGN4X, AMOT, CXADR, VCL, TGFB2, GJC1
GO:0040008~regulation of growth	0.000621156	2.19889	0.150468	SGPL1, YEATS4, TMX1, ING2, FGF9, ZMAT3, TFCP2L1, HOXB13, ADIPOR1, CSDA, HMGA2, CXADR, CHPT1, TTL, C20ORF20, TGFB2, NTRK3, PHF17, BBS2, CTH, PAK2, NRG1, GPAM, IGFBP5
GO:0022403~cell cycle phase	0.000814274	2.03755	0.175031	BCAT1, HAUS5, NEK2, AURKA, RCC1, CCNG2, PSMC3IP, MTBP, SKA2, SNHG3-RCC1, TCF3, HELLS, TRIP13, EXO1, CDC6, YEATS4, SGOL1, CDK6, TPD52L1, CENPE, CDKN3, HMGA2, SMC2, FOXN3, SMC4, MAD2L1, ZWINT, NUP43
GO:0051726~regulation of cell cycle	0.000976283	2.17093	0.189203	CDC6, ZAK, MSH2, NEK2, EDN1, CDK6, CENPE, RCC1, CDKN3, CCNG2, FOXN3, TGFB2, CDC42, CASP3, MAD2L1, ZWINT, UBA3, MTBP, CABLES2, TGFA, SIK1, TCF3, HPGD, SNHG3-RCC1
GO:0007059~chromosome segregation	0.00108296	3.8571	0.192068	MAD2L1, NEK2, ZWINT, SGOL1, CENPE, SKA2, NUP43, SMC2, SRPK1, SMC4
GO:0000280~nuclear division	0.00189209	2.41419	0.291145	CDC6, YEATS4, HAUS5, NEK2, SGOL1, AURKA, CENPE, RCC1, HMGA2, CCNG2, SMC2, SMC4, MAD2L1, ZWINT, SKA2, NUP43, SNHG3-RCC1, HELLS
GO:0007067~mitosis	0.00189209	2.41419	0.291145	CDC6, YEATS4, HAUS5, NEK2, SGOL1, AURKA, CENPE, RCC1, HMGA2, CCNG2, SMC2, SMC4, MAD2L1, ZWINT, SKA2, NUP43, SNHG3-RCC1, HELLS
GO:0019637~organophosphate metabolic process	0.00192365	2.4994	0.277371	GPD2, PLA2G15, SPHK2, LPGAT1, ABHD5, LPCAT2, CHPT1, PIGK, AGPAT5, AGPAT9, MBOAT2, GK, PLCB1, ALG12, AGPAT3, GPAM
GO:0051130~positive regulation of cellular component organization	0.00202077	2.58916	0.27278	EDN1, CENPE, KIT, TGFB2, NTRK3, CDC42, MIB1, NCK2, CTTNBP2, TGFA, AMOT, SEMA4D, CD24, NEFL, ADAM9
GO:0000087~M phase of mitotic cell cycle	0.00227541	2.37108	0.285584	CDC6, YEATS4, HAUS5, NEK2, SGOL1, AURKA, CENPE, RCC1, HMGA2, CCNG2, SMC2, SMC4, MAD2L1, ZWINT, SKA2, NUP43, SNHG3-RCC1, HELLS
GO:0007169~transmembrane receptor protein tyrosine kinase signaling pathway	0.00227541	2.37108	0.285584	SGPL1, REPS2, NIN, FGF9, KIT, SRC, EPHA5, NTRK3, SS18, NCK2, EIF4EBP2, ERBB2IP, TEK, SORT1, NRG1, SIK2, AKT2
GO:0048285~organelle fission	0.00283377	2.31931	0.325839	CDC6, YEATS4, HAUS5, NEK2, SGOL1, AURKA, CENPE, RCC1, HMGA2, CCNG2, SMC2, SMC4, MAD2L1, ZWINT, SKA2, NUP43, SNHG3-RCC1, HELLS
GO:0033630~positive regulation of cell adhesion mediated by integrin	0.00298775	31.2425	0.324732	CD24, ADAM9, TGFB2
GO:0007167~enzyme linked receptor protein signaling pathway	0.00328949	2.00975	0.336091	SGPL1, TWSG1, REPS2, NIN, FGF9, FSTL1, KIT, SRC, TGFB2, EPHA5, NTRK3, SS18, NCK2, EIF4EBP2, ERBB2IP, TEK, SORT1, NRG1, HPGD, SIK2, AKT2, ADAM9
GO:0016053~organic acid biosynthetic process	0.00408997	2.62034	0.383697	BCAT1, PTGES2, DHFRL1, EDN1, ABHD5, ACACA, ELOVL1, PECR, CTH, DHFR, PHGDH, SCD5, UGP2
GO:0046394~carboxylic acid biosynthetic process	0.00408997	2.62034	0.383697	BCAT1, PTGES2, DHFRL1, EDN1, ABHD5, ACACA, ELOVL1, PECR, CTH, DHFR, PHGDH, SCD5, UGP2
GO:0009070~serine family amino acid biosynthetic process	0.00440684	11.3609	0.391501	CTH, DHFR, DHFRL1, PHGDH
GO:0006631~fatty acid metabolic process	0.00456328	2.36686	0.388017	PPARA, PLA2G15, PTGES2, ABHD5, EDN1, ACACA, ADIPOR1, LYPLA1, ELOVL1, PRKAR2B, PECR, SCD5, AACS, GPAM, HPGD
GO:0000070~mitotic sister chromatid segregation	0.00540657	5.20708	0.426924	MAD2L1, NEK2, ZWINT, CENPE, SMC2, SMC4
GO:0000819~sister chromatid segregation	0.00609082	5.06635	0.451886	MAD2L1, NEK2, ZWINT, CENPE, SMC2, SMC4
GO:0042375~quinone cofactor metabolic process	0.00728424	9.61308	0.498792	VKORC1, COQ9, COQ7, PDSS1
GO:0000226~microtubule cytoskeleton organization	0.00751889	2.55041	0.496234	CEP72, HAUS5, NEK2, TBCE, AURKA, RCC1, TTL, BBS2, CTTNBP2, SS18, ZWINT, SNHG3-RCC1, NEFL
GO:0008610~lipid biosynthetic process	0.00787709	1.93452	0.49934	PTGES2, LPGAT1, SPHK2, TFCP2L1, ABHD5, EDN1, ACACA, LPCAT2, PDSS1, CHPT1, ELOVL1, PECR, PIGK, AGPAT5, AGPAT9, MBOAT2, SCD5, ALG12, AGPAT3, GPAM
GO:0006644~phospholipid metabolic process	0.00804006	2.30208	0.493878	PLA2G15, SPHK2, LPGAT1, ABHD5, LPCAT2, CHPT1, PIGK, AGPAT5, AGPAT9, MBOAT2, PLCB1, AGPAT3, GPAM, ALG12
GO:0051783~regulation of nuclear division	0.00863445	3.90531	0.506541	CDC42, MAD2L1, NEK2, EDN1, TGFA, CENPE, RCC1, SNHG3-RCC1
GO:0007088~regulation of mitosis	0.00863445	3.90531	0.506541	CDC42, MAD2L1, NEK2, EDN1, TGFA, CENPE, RCC1, SNHG3-RCC1
GO:0000279~M phase	0.00955355	1.89924	0.530365	EXO1, CDC6, YEATS4, HAUS5, NEK2, SGOL1, AURKA, CENPE, HMGA2, RCC1, SMC2, CCNG2, SMC4, MAD2L1, ZWINT, PSMC3IP, SKA2, NUP43, SNHG3-RCC1, HELLS, TRIP13
GO:0006665~sphingolipid metabolic process	0.00989916	3.33253	0.531402	SGPL1, PLA2G15, TEX2, SPHK2, GM2A, ITGB8, KIT, CERK
